# Supplementary material for: Genetic Diversity of SARS-CoV-2 among Travelers Arriving in Hong Kong
Source: PubMed Central journal article supplement (PMC8462320; doi:10.3201/eid2710.211028), 2021-10
Supplement: 21-1028-Techapp-s1.pdf [file 21-1028-Techapp-s1.pdf]

# Genetic Diversity of SARS-CoV-2 among Travelers Arriving in Hong Kong

## Appendix

### Additional Methods

#### Sequencing

Followed a recommendation from the European Centre for Disease Prevention and Control, we selected 10% of our imported cases for sequence analysis ([https://ec.europa.eu/info/sites/default/files/communication-united-front-beat-covid-19\\_en.pdf](https://ec.europa.eu/info/sites/default/files/communication-united-front-beat-covid-19_en.pdf)). We selected clinical samples with a cycle threshold value  $<30$  for the next generation sequencing study. Beginning in June 2020, we sequenced (mean  $\pm$ SD)  $20.7 \pm 10.7$  samples from each month. We sent RNA samples of interest to a World Health Organization reference laboratory at the University of Hong Kong for full genome analyses (IRB no. UW 20–168). We deduced near full-length genomes from all available samples (sequence length  $>29,700$  nt; sequence coverage  $>100$ ) using a Illumina sequencing protocol described elsewhere (1,2). Briefly, we performed reverse transcription PCR on the virus genome with multiple gene-specific primers targeting different regions. We then subjected the synthesized cDNA to multiple overlapping 2 kb PCRs for full-genome amplification. We pooled PCR amplicons obtained from the same specimen and sequenced them using Nova sequencing platform (Illumina; <https://www.illumina.com>). We prepared the sequencing library by Nextera XT (Illumina).

#### Phylogenetic analysis

We mapped generated sequencing reads to a reference virus genome using Burrows-Wheeler Aligner (<http://bio-bwa.sourceforge.net>), and generated genome consensus using Geneious version 11.1.4 (<https://www.geneious.com>). With the full set of sequences imported to Hong Kong in this study, we used the BEAST v1.10.4 GMRF Bayesian Skyride (<http://www.beast2.org/features/tree-prior-gmrf-bayesian-skyride.html>) coalescent model (3). We used the HKY+ $\Gamma$  nucleotide substitution model along with an uncorrelated relaxed molecular

clock with the lognormal distribution. We ran the MCC-seq (methylC-capture sequencing) chains 400 million times, sampling every 40,000 and discarding 10% as burn-in. Sufficient sampling was inspected by Tracer v1.7.1 (<https://github.com/beast-dev/tracer/releases/tag/v1.7.2>) (4), confirming that the effective sample size (ESS) of each parameter was >1000. We classified lineages using PANGO nomenclature proposal (pangoLEARN v. 2021-04-01; <https://github.com/cov-lineages/pangoLEARN>) (5).

## References

1. Choi EM, Chu DKW, Cheng PKC, Tsang DNC, Peiris M, Bausch DG, et al. In-flight transmission of SARS-CoV-2. *Emerg Infect Dis.* 2020;26:2713–6. [PubMed](#)  
<https://doi.org/10.3201/eid2611.203254>
2. Sit THC, Brackman CJ, Ip SM, Tam KWS, Law PYT, To EMW, et al. Infection of dogs with SARS-CoV-2. *Nature.* 2020;586:776–8. [PubMed](#) <https://doi.org/10.1038/s41586-020-2334-5>
3. Suchard MA, Lemey P, Baele G, Ayres DL, Drummond AJ, Rambaut A. Bayesian phylogenetic and phylodynamic data integration using BEAST 1.10. *Virus Evol.* 2018;4:vey016. [PubMed](#)  
<https://doi.org/10.1093/ve/vey016>
4. Rambaut A, Drummond AJ, Xie D, Baele G, Suchard MA. Posterior summarization in Bayesian phylogenetics using Tracer 1.7. *Syst Biol.* 2018;67:901–4. [PubMed](#)  
<https://doi.org/10.1093/sysbio/syy032>
5. Rambaut A, Holmes EC, O’Toole Á, Hill V, McCrone JT, Ruis C, et al. A dynamic nomenclature proposal for SARS-CoV-2 lineages to assist genomic epidemiology. *Nat Microbiol.* 2020;5:1403–7. [PubMed](#) <https://doi.org/10.1038/s41564-020-0770-5>

**Appendix Table 1.** Country of origin of imported COVID-19 cases\*

| Country                     | No. total cases | No. sequenced cases |
|-----------------------------|-----------------|---------------------|
| UK                          | 406             | 21                  |
| Philippines                 | 318             | 46                  |
| India                       | 309             | 32                  |
| Pakistan                    | 245             | 21                  |
| Indonesia                   | 149             | 18                  |
| USA                         | 131             | 11                  |
| Nepal                       | 75              | 20                  |
| Russia                      | 40              | 3                   |
| France                      | 33              | 2                   |
| UAE                         | 25              | 4                   |
| Japan                       | 23              | 3                   |
| Turkey                      | 21              | 2                   |
| Canada                      | 20              | 1                   |
| Germany                     | 19              | 2                   |
| Switzerland                 | 17              | 2                   |
| Kazakhstan                  | 15              | 3                   |
| Mainland China              | 14              | 6                   |
| Bangladesh                  | 13              | 2                   |
| Egypt                       | 12              | 2                   |
| Ethiopia                    | 12              | 1                   |
| Spain                       | 12              | 0                   |
| Ukraine                     | 12              | 0                   |
| Bolivia/Canada/Peru         | 8               | 0                   |
| Singapore/Malaysia/China    | 8               | 0                   |
| Belgium                     | 7               | 2                   |
| Brazil                      | 7               | 0                   |
| Canada/USA                  | 7               | 2                   |
| Morocco                     | 7               | 0                   |
| Netherlands                 | 7               | 2                   |
| Unknown                     | 7               | 0                   |
| Australia                   | 5               | 0                   |
| Ecuador                     | 5               | 0                   |
| Finland/Singapore/Sweden    | 5               | 0                   |
| France/Switzerland          | 5               | 0                   |
| Ireland                     | 5               | 2                   |
| UK/USA                      | 5               | 0                   |
| Poland                      | 4               | 1                   |
| Romania                     | 4               | 0                   |
| Argentina/Brazil/Chile/Peru | 3               | 0                   |
| Denmark                     | 3               | 0                   |
| France/Spain                | 3               | 0                   |
| Malaysia                    | 3               | 0                   |
| Peru                        | 3               | 0                   |
| Serbia                      | 3               | 0                   |
| South Africa                | 3               | 0                   |
| Sweden                      | 3               | 0                   |
| Switzerland/UK              | 3               | 0                   |
| Argentina                   | 2               | 0                   |
| Australia/UAE/UK            | 2               | 0                   |
| Austria/France              | 2               | 0                   |
| Austria/Switzerland         | 2               | 0                   |
| Bahrain                     | 2               | 0                   |
| Belarus                     | 2               | 0                   |
| Belarus/Lithuania/Turkey    | 2               | 1                   |
| Czech/France/UK             | 2               | 0                   |
| Finland/Iceland             | 2               | 0                   |
| France/Spain/UK             | 2               | 0                   |
| France/UK                   | 2               | 0                   |
| Hungary                     | 2               | 1                   |
| Iceland/UK                  | 2               | 0                   |
| Iran                        | 2               | 0                   |
| Japan/Thailand              | 2               | 0                   |

| Country                           | No. total cases | No. sequenced cases |
|-----------------------------------|-----------------|---------------------|
| Korea                             | 2               | 1                   |
| Mexico                            | 2               | 0                   |
| Myanmar                           | 2               | 0                   |
| Netherlands/UK                    | 2               | 0                   |
| Nigeria                           | 2               | 0                   |
| Portugal/Switzerland/USA          | 2               | 0                   |
| Qatar                             | 2               | 0                   |
| Togo                              | 2               | 0                   |
| Tunisia                           | 2               | 0                   |
| Africa/Brazil                     | 1               | 0                   |
| Albania                           | 1               | 0                   |
| Albania/Turkey/UAE                | 1               | 0                   |
| Argentina/Brazil                  | 1               | 1                   |
| Argentina/Brazil/Chile            | 1               | 0                   |
| Argentina/Chile                   | 1               | 0                   |
| Australia/France                  | 1               | 0                   |
| Austria                           | 1               | 0                   |
| Austria/Germany                   | 1               | 0                   |
| Austria/Netherlands/Switzerland   | 1               | 0                   |
| Austria/Spain/UK/Thailand         | 1               | 0                   |
| Azerbaijan                        | 1               | 0                   |
| Bahrain/USA/Belgium/Luxembourg    | 1               | 0                   |
| Belgium/Ethiopia                  | 1               | 0                   |
| Belgium/China/Ethiopia            | 1               | 0                   |
| Botswana                          | 1               | 0                   |
| Brazil/UK                         | 1               | 0                   |
| Bulgaria                          | 1               | 0                   |
| Bulgaria/Turkey                   | 1               | 0                   |
| Canada/India                      | 1               | 0                   |
| Canada/UK                         | 1               | 0                   |
| Canada/UK/USA                     | 1               | 0                   |
| Czech Republic                    | 1               | 0                   |
| Denmark/Ireland/Poland/UK/Sweden  | 1               | 0                   |
| Egypt/UAE                         | 1               | 0                   |
| Ethiopia/UAE/Belgium/Norway/Korea | 1               | 0                   |
| Ethiopia/Belgium                  | 1               | 0                   |
| Ethiopia/Belgium/Norway/Korea     | 1               | 0                   |
| Ethiopia/Spain                    | 1               | 0                   |
| Finland/Sweden                    | 1               | 1                   |
| France/Austria                    | 1               | 0                   |
| France/Morocco                    | 1               | 0                   |
| France/Netherlands                | 1               | 0                   |
| France/Netherlands/UK             | 1               | 0                   |
| France/Switzerland/UK             | 1               | 0                   |
| France/Taiwan                     | 1               | 0                   |
| France/UK/USA                     | 1               | 0                   |
| Gambia                            | 1               | 0                   |
| Germany/Italy/France              | 1               | 1                   |
| Germany/Italy/UAE                 | 1               | 0                   |
| Germany/Japan                     | 1               | 0                   |
| Germany/Netherlands/Switzerland   | 1               | 0                   |
| Germany/Russia/Singapore/UAE      | 1               | 1                   |
| Germany/UK                        | 1               | 0                   |
| Ghana                             | 1               | 0                   |
| India/Qatar                       | 1               | 0                   |
| India/Netherlands/UK              | 1               | 0                   |
| India/UK                          | 1               | 0                   |
| Indonesia/Switzerland             | 1               | 0                   |
| Indonesia/UK                      | 1               | 0                   |
| Ireland/Spain/Malta/UK            | 1               | 0                   |
| Italy                             | 1               | 0                   |
| Italy/Malta/Ukraine               | 1               | 0                   |
| Japan/Korea                       | 1               | 0                   |

| Country                            | No. total cases | No. sequenced cases |
|------------------------------------|-----------------|---------------------|
| Kazakhstan/Turkey                  | 1               | 0                   |
| Kenya                              | 1               | 0                   |
| Luxemburg/USA/Azerbaijan/Japan     | 1               | 0                   |
| Maldives/Qatar                     | 1               | 0                   |
| Malta                              | 1               | 0                   |
| Mauritania                         | 1               | 0                   |
| Mexico/Brazil                      | 1               | 0                   |
| Mexico/UK/USA                      | 1               | 0                   |
| Montenegro                         | 1               | 0                   |
| Netherlands/UK                     | 1               | 0                   |
| Netherlands/Thailand/UK            | 1               | 0                   |
| Norway                             | 1               | 0                   |
| Philippines/Japan                  | 1               | 1                   |
| Philippines/USA                    | 1               | 0                   |
| Portugal/Spain                     | 1               | 0                   |
| Portugal/Spain/UK                  | 1               | 0                   |
| Russia/South Africa                | 1               | 0                   |
| Russia/Turkey/Netherlands/Thailand | 1               | 0                   |
| Rwanda                             | 1               | 0                   |
| Saudi Arabia                       | 1               | 0                   |
| Singapore                          | 1               | 0                   |
| Singapore/Malaysia/Philippines     | 1               | 0                   |
| Singapore/UK                       | 1               | 0                   |
| South Africa/UK                    | 1               | 0                   |
| Spain/UK                           | 1               | 0                   |
| Sri Lanka/UK                       | 1               | 0                   |
| Switzerland/Germany                | 1               | 0                   |
| Switzerland/Sweden                 | 1               | 0                   |
| Syria                              | 1               | 0                   |
| Tanzania                           | 1               | 0                   |
| Turkey/China/USA/Netherlands       | 1               | 0                   |
| Turkey/Russia                      | 1               | 0                   |
| Ukraine/Czech/Korea                | 1               | 0                   |
| UK/Israel/USA                      | 1               | 1                   |
| UK/Jamaica                         | 1               | 0                   |
| UK/South Africa                    | 1               | 1                   |
| UK/UAE                             | 1               | 0                   |
| UK/USA/Barbados                    | 1               | 0                   |
| UK/Germany/UAE                     | 1               | 0                   |
| UK/Indonesia                       | 1               | 0                   |
| UK/Spain                           | 1               | 0                   |
| UK/Switzerland                     | 1               | 0                   |
| UK/UAE/India                       | 1               | 0                   |
| USA/Australia                      | 1               | 0                   |
| USA/Japan/Korea                    | 1               | 0                   |
| USA/France/Japan                   | 1               | 0                   |
| <b>Total</b>                       | <b>2,192</b>    | <b>221</b>          |

\*Case-patients with a recent travel history to multiple countries before arriving in Hong Kong analyzed separately.

**Appendix Table 2.** Pango lineages identified in this study

| Pango lineage | No. cases |
|---------------|-----------|
| A.21          | 1         |
| B             | 7         |
| B.1           | 17        |
| B.1.1         | 17        |
| B.1.1.1       | 2         |
| B.1.1.117     | 1         |
| B.1.1.138     | 1         |
| B.1.1.141     | 1         |
| B.1.1.214     | 2         |
| B.1.1.216     | 5         |
| B.1.1.25      | 1         |
| B.1.1.263     | 1         |
| B.1.1.272     | 1         |
| B.1.1.306     | 1         |
| B.1.1.317     | 1         |
| B.1.1.349     | 2         |
| B.1.1.372     | 1         |
| B.1.1.39      | 1         |
| B.1.1.398     | 1         |
| B.1.1.461     | 1         |
| B.1.1.63      | 21        |
| B.1.1.7       | 39        |
| B.1.160       | 2         |
| B.1.177       | 3         |
| B.1.177.15    | 0         |
| B.1.177.57    | 3         |
| B.1.177.7     | 1         |
| B.1.177.87    | 1         |
| B.1.2         | 3         |
| B.1.210       | 3         |
| B.1.221       | 1         |
| B.1.258       | 3         |
| B.1.351       | 7         |
| B.1.36        | 18        |
| B.1.36.18     | 2         |
| B.1.36.19     | 5         |
| B.1.36.22     | 2         |
| B.1.36.27     | 6         |
| B.1.36.29     | 2         |
| B.1.36.36     | 1         |
| B.1.36.8      | 2         |
| B.1.362.2     | 1         |
| B.1.369       | 1         |
| B.1.426       | 1         |
| B.1.459       | 1         |
| B.1.468       | 2         |
| B.1.470       | 8         |
| B.1.471       | 1         |
| B.1.499       | 1         |
| B.1.526       | 1         |
| B.1.562       | 1         |
| B.1.565       | 1         |
| B.1.589       | 1         |
| B.1.617       | 1         |
| B.4           | 1         |
| B.6           | 1         |
| C.18          | 2         |
| P.3           | 6         |

**Appendix Table 3.** The first sample collection date reported by country and the arrival date of the first imported cases detected in this study.

| Country,<br>Pango lineage | Date reported to<br>GISAID by country | First imported case in<br>this study |
|---------------------------|---------------------------------------|--------------------------------------|
| <b>Philippines</b>        |                                       |                                      |
| B.1.1†                    | 2020 Jun 25                           | 2020 Jul 11                          |
| B.1.1.263                 | 2020 Oct 12                           | 2020 Jul 6                           |
| B.1.1.63†                 | 2020 Jun                              | 2020 Jun 23                          |
| B.1.1.7                   | 2020 Dec 10                           | 2021 Feb 24                          |
| B.1.351*                  | No sequence                           | 2021 Mar 6                           |
| B.6                       | Mar 4                                 | 2020 Jul 6                           |
| P.3#                      | 2021 Jan 16                           | 2021 Jan 21                          |
| <b>Nepal</b>              |                                       |                                      |
| B.1.1                     | 2020 Aug 3                            | 2021 Jan 5                           |
| B.1.1.214*                | No sequence                           | 2020 Nov 10                          |
| B.1.1.216                 | 2020 Jul 30                           | 2020 Oct 3                           |
| B.1.36                    | 2020 Jul 30                           | 2020 Oct 20                          |
| B.1.36.18*                | No sequence                           | 2020 Nov 10                          |
| B.1.36.22*                | No sequence                           | 2020 Dec 21                          |
| B.1.36.27*                | No sequence                           | 2020 Sep 9                           |
| B.1.468*                  | No sequence                           | 2020 Dec 29                          |
| <b>Pakistan</b>           |                                       |                                      |
| A.21*                     | No sequence                           | 2020 Jun 20                          |
| B.1                       | 2020 May 3                            | 2020 Oct 19                          |
| B.1.1.1                   | 2020 Jul 7                            | 2020 Dec 1                           |
| B.1.1.7†                  | 2020 Dec 25                           | 2021 Jan 5                           |
| B.1.36                    | 2020 Jun 2                            | 2020 Nov 22                          |
| B.1.471†                  | 2020 May 20                           | 2020 Jun 20                          |

\*Lineage not reported by country

†Lineage with the sample collection date reported by the country close to our first imported case

**Appendix Table 4.** COVID-19 sequences reported in this study

| Virus name                          | GISAID no.      |
|-------------------------------------|-----------------|
| hCoV-19/Hong Kong/VM20127572-1/2020 | EPI_ISL_1718252 |
| hCoV-19/Hong Kong/CM21000014/2021   | EPI_ISL_1718270 |
| hCoV-19/Hong Kong/VM20030723-1/2020 | EPI_ISL_1718271 |
| hCoV-19/Hong Kong/VM20035559/2020   | EPI_ISL_1731057 |
| hCoV-19/Hong Kong/VM20028080/2020   | EPI_ISL_1749650 |
| hCoV-19/Hong Kong/CM20000284/2020   | EPI_ISL_1749657 |
| hCoV-19/Hong Kong/VM20123555-1/2020 | EPI_ISL_1749662 |
| hCoV-19/Hong Kong/VM20089384/2020   | EPI_ISL_1749669 |
| hCoV-19/Hong Kong/VM21000356/2021   | EPI_ISL_1761404 |
| hCoV-19/Hong Kong/VM20194433/2020   | EPI_ISL_1761417 |
| hCoV-19/Hong Kong/VM20153752/2020   | EPI_ISL_1761420 |
| hCoV-19/Hong Kong/VM20127230/2020   | EPI_ISL_1761429 |
| hCoV-19/Hong Kong/VB20239988/2020   | EPI_ISL_1761431 |
| hCoV-19/Hong Kong/VM20030143/2020   | EPI_ISL_1761447 |
| hCoV-19/Hong Kong/VM20134624/2020   | EPI_ISL_1793811 |
| hCoV-19/Hong Kong/VM20030475/2020   | EPI_ISL_1793822 |
| hCoV-19/Hong Kong/CM20000427-1/2020 | EPI_ISL_1793836 |
| hCoV-19/Hong Kong/CM20000444-1/2020 | EPI_ISL_1793841 |
| hCoV-19/Hong Kong/CM20000283/2020   | EPI_ISL_1811327 |
| hCoV-19/Hong Kong/CM20000156/2020   | EPI_ISL_1811334 |
| hCoV-19/Hong Kong/VM20123558-1/2020 | EPI_ISL_1811338 |
| hCoV-19/Hong Kong/VM20124082/2020   | EPI_ISL_1811349 |
| hCoV-19/Hong Kong/VM20196332/2020   | EPI_ISL_1811353 |
| hCoV-19/Hong Kong/VM20143876/2020   | EPI_ISL_1819089 |
| hCoV-19/Hong Kong/VM20194110/2020   | EPI_ISL_1819091 |
| hCoV-19/Hong Kong/VM21000357/2021   | EPI_ISL_1819095 |
| hCoV-19/Hong Kong/VM20056300/2020   | EPI_ISL_1819119 |
| hCoV-19/Hong Kong/VM20193891/2020   | EPI_ISL_1819121 |
| hCoV-19/Hong Kong/VM20121505/2020   | EPI_ISL_1819127 |
| hCoV-19/Hong Kong/VM20197060/2020   | EPI_ISL_1819131 |
| hCoV-19/Hong Kong/VM20126621/2020   | EPI_ISL_1819143 |
| hCoV-19/Hong Kong/VM20146611/2020   | EPI_ISL_1819149 |
| hCoV-19/Hong Kong/VM20031164/2020   | EPI_ISL_1819169 |
| hCoV-19/Hong Kong/VM20123560-1/2020 | EPI_ISL_1828743 |
| hCoV-19/Hong Kong/VM20194436/2020   | EPI_ISL_1828744 |
| hCoV-19/Hong Kong/WHP1765/2020      | EPI_ISL_1828746 |

| Virus name                          | GISAID no.      |
|-------------------------------------|-----------------|
| hCoV-19/Hong Kong/VM20120084/2020   | EPI_ISL_1828751 |
| hCoV-19/Hong Kong/CM20000179/2020   | EPI_ISL_1828754 |
| hCoV-19/Hong Kong/VM20194108/2020   | EPI_ISL_1828757 |
| hCoV-19/Hong Kong/VM20149336/2020   | EPI_ISL_1828761 |
| hCoV-19/Hong Kong/VM20141728-1/2020 | EPI_ISL_1828764 |
| hCoV-19/Hong Kong/CM21000050/2021   | EPI_ISL_1828774 |
| hCoV-19/Hong Kong/CM21000044/2021   | EPI_ISL_1897307 |
| hCoV-19/Hong Kong/VB20239959/2020   | EPI_ISL_1897350 |
| hCoV-19/Hong Kong/VM20187651/2020   | EPI_ISL_1914430 |
| hCoV-19/Hong Kong/VM20128239/2020   | EPI_ISL_1914438 |
| hCoV-19/Hong Kong/VB20235197/2020   | EPI_ISL_1914451 |
| hCoV-19/Hong Kong/VM20131770/2020   | EPI_ISL_1914464 |
| hCoV-19/Hong Kong/VM20193653/2020   | EPI_ISL_1914475 |
| hCoV-19/Hong Kong/CM20000211/2020   | EPI_ISL_1914476 |
| hCoV-19/Hong Kong/VM20197057/2020   | EPI_ISL_1914477 |
| hCoV-19/Hong Kong/CM20000221-1/2020 | EPI_ISL_1914478 |
| hCoV-19/Hong Kong/VM20127500/2020   | EPI_ISL_1914479 |
| hCoV-19/Hong Kong/VM20030473/2020   | EPI_ISL_1914480 |
| hCoV-19/Hong Kong/VM20126594/2020   | EPI_ISL_1914481 |
| hCoV-19/Hong Kong/VM20109249/2020   | EPI_ISL_1914482 |
| hCoV-19/Hong Kong/VM20137973/2020   | EPI_ISL_1914483 |
| hCoV-19/Hong Kong/VM20193204/2020   | EPI_ISL_1914484 |
| hCoV-19/Hong Kong/CM21000031/2021   | EPI_ISL_1914485 |
| hCoV-19/Hong Kong/VM200-58490/2020  | EPI_ISL_1914486 |
| hCoV-19/Hong Kong/VB20227521/2020   | EPI_ISL_1914487 |
| hCoV-19/Hong Kong/VM20029491/2020   | EPI_ISL_1914488 |
| hCoV-19/Hong Kong/VB20299920/2020   | EPI_ISL_1914489 |
| hCoV-19/Hong Kong/VM20129417/2020   | EPI_ISL_1914490 |
| hCoV-19/Hong Kong/VM20154035/2020   | EPI_ISL_1914491 |
| hCoV-19/Hong Kong/VM20149166-1/2020 | EPI_ISL_1914492 |
| hCoV-19/Hong Kong/VM20139861/2020   | EPI_ISL_1914493 |
| hCoV-19/Hong Kong/VM20195199/2020   | EPI_ISL_1914494 |
| hCoV-19/Hong Kong/VM20136554/2020   | EPI_ISL_1914495 |
| hCoV-19/Hong Kong/VM20149334/2020   | EPI_ISL_1914496 |
| hCoV-19/Hong Kong/CM20000176/2020   | EPI_ISL_1914497 |
| hCoV-19/Hong Kong/CM20000461-1/2020 | EPI_ISL_1914498 |
| hCoV-19/Hong Kong/VM21000250/2021   | EPI_ISL_1914499 |
| hCoV-19/Hong Kong/VM20037354/2020   | EPI_ISL_1914500 |
| hCoV-19/Hong Kong/VM20027143-1/2020 | EPI_ISL_1914501 |
| hCoV-19/Hong Kong/VM20027699/2020   | EPI_ISL_1914502 |
| hCoV-19/Hong Kong/VM20194109/2020   | EPI_ISL_1914503 |
| hCoV-19/Hong Kong/VM20030364/2020   | EPI_ISL_1914504 |
| hCoV-19/Hong Kong/VM20082690/2020   | EPI_ISL_1914505 |
| hCoV-19/Hong Kong/VM20032529/2020   | EPI_ISL_1914506 |
| hCoV-19/Hong Kong/CH20186398/2020   | EPI_ISL_1914507 |
| hCoV-19/Hong Kong/VM20136998/2020   | EPI_ISL_1914508 |
| hCoV-19/Hong Kong/CM21000015/2021   | EPI_ISL_1914509 |
| hCoV-19/Hong Kong/VM20152069/2020   | EPI_ISL_1914510 |
| hCoV-19/Hong Kong/VM21001490/2021   | EPI_ISL_1914511 |
| hCoV-19/Hong Kong/CM20000193/2020   | EPI_ISL_1914512 |
| hCoV-19/Hong Kong/VM20063224/2020   | EPI_ISL_1914513 |
| hCoV-19/Hong Kong/VM20138739/2020   | EPI_ISL_1914514 |
| hCoV-19/Hong Kong/CV20089510/2020   | EPI_ISL_1914515 |
| hCoV-19/Hong Kong/VM20193892/2020   | EPI_ISL_1914516 |
| hCoV-19/Hong Kong/VB20329247/2020   | EPI_ISL_1914517 |
| hCoV-19/Hong Kong/VM20033948/2020   | EPI_ISL_1914518 |
| hCoV-19/Hong Kong/VM20195030/2020   | EPI_ISL_1914519 |
| hCoV-19/Hong Kong/VM20139199-1/2020 | EPI_ISL_1914520 |
| hCoV-19/Hong Kong/VM20030363/2020   | EPI_ISL_1914521 |
| hCoV-19/Hong Kong/CM20000424-1/2020 | EPI_ISL_1914522 |
| hCoV-19/Hong Kong/CM21000021/2021   | EPI_ISL_1914523 |
| hCoV-19/Hong Kong/VM20149375/2020   | EPI_ISL_1914524 |
| hCoV-19/Hong Kong/VM20196066/2020   | EPI_ISL_1914525 |
| hCoV-19/Hong Kong/VB20245514/2020   | EPI_ISL_1914526 |
| hCoV-19/Hong Kong/CM21000063/2021   | EPI_ISL_1914527 |
| hCoV-19/Hong Kong/VM20141448/2020   | EPI_ISL_1914528 |
| hCoV-19/Hong Kong/VM20197058/2020   | EPI_ISL_1914529 |
| hCoV-19/Hong Kong/VM20122595/2020   | EPI_ISL_1914530 |
| hCoV-19/Hong Kong/VM20126174/2020   | EPI_ISL_1914531 |



| Virus name                          | GISAID no.      |
|-------------------------------------|-----------------|
| hCoV-19/Hong Kong/CM21000012/2021   | EPI_ISL_1914532 |
| hCoV-19/Hong Kong/VM20134148/2020   | EPI_ISL_1914533 |
| hCoV-19/Hong Kong/VM20124689-1/2020 | EPI_ISL_1914534 |
| hCoV-19/Hong Kong/VB20227528/2020   | EPI_ISL_1914535 |
| hCoV-19/Hong Kong/VM20139862/2020   | EPI_ISL_1914536 |
| hCoV-19/Hong Kong/CM21000019/2021   | EPI_ISL_1914537 |
| hCoV-19/Hong Kong/VM20141727/2020   | EPI_ISL_1914538 |
| hCoV-19/Hong Kong/CM20000166/2020   | EPI_ISL_1914539 |
| hCoV-19/Hong Kong/VM20196067/2020   | EPI_ISL_1914540 |
| hCoV-19/Hong Kong/CV20083787/2020   | EPI_ISL_1914541 |
| hCoV-19/Hong Kong/VM20135297/2020   | EPI_ISL_1914542 |
| hCoV-19/Hong Kong/VM20132139/2020   | EPI_ISL_1914543 |
| hCoV-19/Hong Kong/VM20153747/2020   | EPI_ISL_1914544 |
| hCoV-19/Hong Kong/VM20080417/2020   | EPI_ISL_1914545 |
| hCoV-19/Hong Kong/VM20186034/2020   | EPI_ISL_1914546 |
| hCoV-19/Hong Kong/VM20031429/2020   | EPI_ISL_1914547 |
| hCoV-19/Hong Kong/CM21000055/2021   | EPI_ISL_1914548 |
| hCoV-19/Hong Kong/VM20120246/2020   | EPI_ISL_1914549 |
| hCoV-19/Hong Kong/VB20221937/2020   | EPI_ISL_1914550 |
| hCoV-19/Hong Kong/CM20000267/2020   | EPI_ISL_1914551 |
| hCoV-19/Hong Kong/CM21000045/2021   | EPI_ISL_1914552 |
| hCoV-19/Hong Kong/CM20000096/2020   | EPI_ISL_1914553 |
| hCoV-19/Hong Kong/CH20186399/2020   | EPI_ISL_1914554 |
| hCoV-19/Hong Kong/VM20030059/2020   | EPI_ISL_1914555 |
| hCoV-19/Hong Kong/VM20149376/2020   | EPI_ISL_1914556 |
| hCoV-19/Hong Kong/VM20128241/2020   | EPI_ISL_1914557 |
| hCoV-19/Hong Kong/VM20030724/2020   | EPI_ISL_1914558 |
| hCoV-19/Hong Kong/CM20000160/2020   | EPI_ISL_1914559 |
| hCoV-19/Hong Kong/VM20189132/2020   | EPI_ISL_1914560 |
| hCoV-19/Hong Kong/CV20080655/2020   | EPI_ISL_1914561 |
| hCoV-19/Hong Kong/VM20031430/2020   | EPI_ISL_1914562 |
| hCoV-19/Hong Kong/VB20304975/2020   | EPI_ISL_1914563 |
| hCoV-19/Hong Kong/VM20196646/2020   | EPI_ISL_1914564 |
| hCoV-19/Hong Kong/VM20140376/2020   | EPI_ISL_1914565 |
| hCoV-19/Hong Kong/VM20195031/2020   | EPI_ISL_1914566 |
| hCoV-19/Hong Kong/VM20121196/2020   | EPI_ISL_1914567 |
| hCoV-19/Hong Kong/VM20153748/2020   | EPI_ISL_1914568 |
| hCoV-19/Hong Kong/CV20080825/2020   | EPI_ISL_1914569 |
| hCoV-19/Hong Kong/VM20187650/2020   | EPI_ISL_1914570 |
| hCoV-19/Hong Kong/CM20000216/2020   | EPI_ISL_1914571 |
| hCoV-19/Hong Kong/VM20123554-1/2020 | EPI_ISL_1914572 |
| hCoV-19/Hong Kong/VM20123559-1/2020 | EPI_ISL_1914573 |
| hCoV-19/Hong Kong/CM21000064/2021   | EPI_ISL_1914574 |
| hCoV-19/Hong Kong/VM200-44231/2020  | EPI_ISL_1914575 |
| hCoV-19/Hong Kong/VM20137971/2020   | EPI_ISL_1919948 |
| hCoV-19/Hong Kong/VM20001794-1/2020 | EPI_ISL_1963574 |
| hCoV-19/Hong Kong/VB20019871-1/2020 | EPI_ISL_1963575 |
| hCoV-19/Hong Kong/VB20026565-1/2020 | EPI_ISL_1963576 |
| hCoV-19/Hong Kong/VM20001403-1/2020 | EPI_ISL_1963577 |
| hCoV-19/Hong Kong/VM20001776-1/2020 | EPI_ISL_1963578 |
| hCoV-19/Hong Kong/VM20002162-1/2020 | EPI_ISL_1963579 |
| hCoV-19/Hong Kong/VM20002849-1/2020 | EPI_ISL_1963580 |
| hCoV-19/Hong Kong/VB20017371/2020   | EPI_ISL_1963581 |
| hCoV-19/Hong Kong/WHP125/2020       | EPI_ISL_1963582 |
| hCoV-19/Hong Kong/WHP126/2020       | EPI_ISL_1963583 |
| hCoV-19/Hong Kong/WHP423/2020       | EPI_ISL_1963584 |
| hCoV-19/Hong Kong/WHP424/2020       | EPI_ISL_1963585 |
| hCoV-19/Hong Kong/WHP869/2020       | EPI_ISL_1963586 |
| hCoV-19/Hong Kong/VM20010001/2020   | EPI_ISL_1963587 |
| hCoV-19/Hong Kong/VM20033958/2020   | EPI_ISL_1963588 |
| hCoV-19/Hong Kong/VM20035710/2020   | EPI_ISL_1963589 |
| hCoV-19/Hong Kong/VM21006178/2021   | EPI_ISL_1963590 |
| hCoV-19/Hong Kong/VM21006467/2021   | EPI_ISL_1963591 |
| hCoV-19/Hong Kong/VM21008310/2021   | EPI_ISL_1963592 |
| hCoV-19/Hong Kong/VM21009395/2021   | EPI_ISL_1963593 |
| hCoV-19/Hong Kong/CM21000141/2021   | EPI_ISL_1963594 |
| hCoV-19/Hong Kong/VM21009999/2021   | EPI_ISL_1963595 |
| hCoV-19/Hong Kong/VM21010780/2021   | EPI_ISL_1963596 |
| hCoV-19/Hong Kong/VM21010776/2021   | EPI_ISL_1963597 |

| Virus name                        | GISAID no.      |
|-----------------------------------|-----------------|
| hCoV-19/Hong Kong/VM21013677/2021 | EPI_ISL_1963598 |
| hCoV-19/Hong Kong/VM21013785/2021 | EPI_ISL_1963599 |
| hCoV-19/Hong Kong/CM21000184/2021 | EPI_ISL_1963600 |
| hCoV-19/Hong Kong/VQ21052023/2021 | EPI_ISL_1963601 |
| hCoV-19/Hong Kong/VQ21051174/2021 | EPI_ISL_1963602 |
| hCoV-19/Hong Kong/CM21000177/2021 | EPI_ISL_1963603 |
| hCoV-19/Hong Kong/VM21013309/2021 | EPI_ISL_1963604 |
| hCoV-19/Hong Kong/VM21013535/2021 | EPI_ISL_1963605 |
| hCoV-19/Hong Kong/CM21000171/2021 | EPI_ISL_1963606 |
| hCoV-19/Hong Kong/CM21000169/2021 | EPI_ISL_1963607 |
| hCoV-19/Hong Kong/VM21012351/2021 | EPI_ISL_1963608 |
| hCoV-19/Hong Kong/VM21013848/2021 | EPI_ISL_1963609 |
| hCoV-19/Hong Kong/VM21013846/2021 | EPI_ISL_1963610 |
| hCoV-19/Hong Kong/CH21027623/2021 | EPI_ISL_1963611 |
| hCoV-19/Hong Kong/CM21000191/2021 | EPI_ISL_1963612 |
| hCoV-19/Hong Kong/CM21000193/2021 | EPI_ISL_1963613 |
| hCoV-19/Hong Kong/VM21014692/2021 | EPI_ISL_1963614 |
| hCoV-19/Hong Kong/VM21014363/2021 | EPI_ISL_1963615 |
| hCoV-19/Hong Kong/VM21014699/2021 | EPI_ISL_1963616 |
| hCoV-19/Hong Kong/CM21000195/2021 | EPI_ISL_1963617 |
| hCoV-19/Hong Kong/VM21015101/2021 | EPI_ISL_1963618 |
| hCoV-19/Hong Kong/VM21015013/2021 | EPI_ISL_1963619 |
| hCoV-19/Hong Kong/VM21015026/2021 | EPI_ISL_1963620 |
| hCoV-19/Hong Kong/VM21016277/2021 | EPI_ISL_1963621 |
| hCoV-19/Hong Kong/CM21000224/2021 | EPI_ISL_1963622 |
| hCoV-19/Hong Kong/CM21000226/2021 | EPI_ISL_1963623 |
| hCoV-19/Hong Kong/CM21000236/2021 | EPI_ISL_1963624 |
| hCoV-19/Hong Kong/CM21000238/2021 | EPI_ISL_1963625 |
| hCoV-19/Hong Kong/VM21015887/2021 | EPI_ISL_1963626 |
| hCoV-19/Hong Kong/VM21002742/2021 | EPI_ISL_1963627 |
| hCoV-19/Hong Kong/VM21003928/2021 | EPI_ISL_1963628 |
| hCoV-19/Hong Kong/VM21017523/2021 | EPI_ISL_1963629 |
| hCoV-19/Hong Kong/VM21017524/2021 | EPI_ISL_1963630 |
| hCoV-19/Hong Kong/VM21017055/2021 | EPI_ISL_1963631 |
| hCoV-19/Hong Kong/VM21017054/2021 | EPI_ISL_1963632 |
| hCoV-19/Hong Kong/VQ21059088/2021 | EPI_ISL_1963633 |
| hCoV-19/Hong Kong/CM21000251/2021 | EPI_ISL_1963634 |
| hCoV-19/Hong Kong/CM21000252/2021 | EPI_ISL_1963635 |
| hCoV-19/Hong Kong/VM21017238/2021 | EPI_ISL_1963636 |
| hCoV-19/Hong Kong/CM21000253/2021 | EPI_ISL_1963637 |
| hCoV-19/Hong Kong/VM21017519/2021 | EPI_ISL_1963638 |
| hCoV-19/Hong Kong/VM21017521/2021 | EPI_ISL_1963639 |
| hCoV-19/Hong Kong/VM21016396/2021 | EPI_ISL_1963640 |
| hCoV-19/Hong Kong/CM21000239/2021 | EPI_ISL_1963641 |
| hCoV-19/Hong Kong/CM21000248/2021 | EPI_ISL_1963642 |
| hCoV-19/Hong Kong/VM21016984/2021 | EPI_ISL_1963643 |
| hCoV-19/Hong Kong/VM21017052/2021 | EPI_ISL_1963644 |

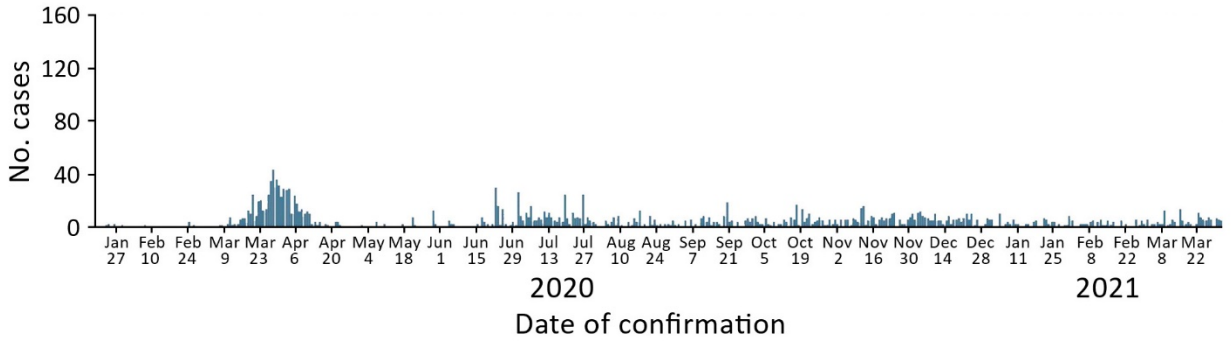

**Appendix Figure.** Daily number of COVID-19 cases imported by travellers to Hong Kong, January 2020–March 2021.
